1 ***Borrelia* infection in rodent host has dramatic effects on the microbiome of ticks**

2

3 Phineas T. Hamilton<sup>1\*</sup>, Elodie Maluenda<sup>2</sup>, Anouk Sarr<sup>2</sup>, Alessandro Belli<sup>3</sup>, Georgia Hurry<sup>4</sup>,

4 Olivier Duron<sup>5,6</sup>, Olivier Plantard<sup>7</sup>, Maarten J. Voordouw<sup>2,4\*</sup>

5

6 <sup>1</sup>Deeley Research Centre, BC Cancer, Victoria BC, Canada

7 <sup>2</sup>Laboratory of Ecology and Evolution of Parasites, Institute of Biology, University of

8 Neuchâtel, Neuchâtel, Switzerland.

9 <sup>3</sup>Laboratory of Ecology and Epidemiology of Parasites, Institute of Biology, University of

10 Neuchâtel, Neuchâtel, Switzerland.

11 <sup>4</sup>Department of Veterinary Microbiology, Western College of Veterinary Medicine, University

12 of Saskatchewan, Saskatoon, Canada.

13 <sup>5</sup>Centre of Research in Ecology and Evolution of Diseases (CREES), Montpellier, France

14 <sup>6</sup>MIVEGEC (Maladies Infectieuses et Vecteurs: Ecologie, Génétique, Evolution et Contrôle),

15 Univ. Montpellier (UM) - Centre National de la Recherche Scientifique (CNRS) - Institut pour la

16 Recherche et le Développement (IRD), Montpellier, France

17 <sup>7</sup>INRAE, Oniris, BIOEPAR, 44300, Nantes, France

18

19 \* Corresponding author email: [phin.hamilton@gmail.com](mailto:phin.hamilton@gmail.com); [maarten.voordouw@usask.ca](mailto:maarten.voordouw@usask.ca)

20

21 **Keywords:** *Borrelia*, dysbiosis, *Ixodes*, Lyme disease, microbiome, tick-borne disease, vector

22

23 **Abstract:**

24 **Background:** Vector-borne diseases remain major causes of human morbidity and mortality. It  
25 is increasingly recognized that the community of microbes inhabiting arthropods can strongly  
26 affect their vector competence, but the role of the tick microbiome in *Borrelia* transmission – the  
27 cause of Lyme disease – remains unclear.

28

29 **Results:** Here, we use a large-scale experiment to clarify the reciprocal interactions between  
30 *Borrelia afzelii* and the microbiome of *Ixodes ricinus*, its primary vector. In contrast to other  
31 reports, we find that depletion of the bacterial microbiome in larval ticks has no effect on their  
32 subsequent acquisition of *B. afzelii* during blood feeding on infected mice. Rather, exposure to *B.*  
33 *afzelii*-infected hosts drives pervasive changes to the tick microbiome, decreasing overall  
34 bacterial abundance, shifting bacterial community composition, and increasing bacterial  
35 diversity. These effects appear to be independent of the acquisition of *B. afzelii* by ticks,  
36 suggesting they are mediated by physiological or immunological aspects of *B. afzelii* infection in  
37 the rodent host.

38

39 **Conclusions:** Manipulation of the microbiome of *I. ricinus* larvae had no effect on their ability  
40 to acquire *B. afzelii*. In contrast, *B. afzelii* infection in the mouse had dramatic effects on the  
41 composition of the gut microbiome in *I. ricinus* nymphs. Our study demonstrates that vector-  
42 borne infections in the vertebrate host shape the microbiome of the arthropod vector.

43

## 44 **Background**

45 Infectious diseases vectored by arthropods impose an enormous burden on human health  
46 [1-3]. For successful transmission, however, vector-borne pathogens must contend with both the  
47 immunological defenses of the arthropod vector, and the community of other microbiota that  
48 inhabit it [4-7], and it is now clear that endogenous microbes can shape the competence of  
49 diverse arthropod vectors in acquiring and transmitting pathogens [8-12]. Experimental  
50 perturbations of the microbiome ('dysbiosis') via the use of antibiotics or other methods have, in  
51 various contexts, been shown to either increase or decrease the susceptibility of arthropods to  
52 colonization by vector-borne pathogens [8, 10, 12, 13]. In particular, the introduction of the  
53 intracellular bacterium *Wolbachia* into mosquito vectors [14] can dramatically reduce mosquito  
54 competence to vector arboviruses, malaria parasites, and filarial nematodes (Kambris et al. 2009,  
55 Moreira et al. 2009, Bian et al. 2010). These effects appear to be mediated through the innate  
56 immune system of the arthropod host, rendering the mosquito less susceptible to infection by  
57 diverse pathogens [15-17]. Similarly, *Enterobacter* bacteria in the midgut of Anopheline  
58 mosquitoes produce reactive oxygen species that can kill malaria parasites [9]. Such direct and  
59 indirect antagonistic interactions have formed the basis of increasingly sophisticated biological  
60 control strategies that include the ongoing use of *Wolbachia* to control Dengue virus  
61 transmission by *Aedes* mosquitoes [3, 14, 18, 19].

62 Hard ticks remain among the most important vectors of infectious disease in the northern  
63 hemisphere, transmitting numerous pathogens that include the causative agents of Lyme  
64 borreliosis ('Lyme disease'), anaplasmosis, babesiosis, and tick-borne encephalitis [20-23]. In  
65 particular, the increasing incidence of Lyme and other tick-borne diseases in parts of Europe and  
66 North America has underscored the public health risks associated with hard ticks [24-28]. Recent

67 work on *Ixodes scapularis* has suggested that perturbations to the tick's microbiome can  
68 influence tick susceptibility to *B. burgdorferi* sensu stricto (ss) and *Anaplasma phagocytophilum*  
69 by affecting the integrity of the tick midgut [8, 12], although the generality and importance of  
70 these effects in the natural transmission of these pathogens are unclear. It is likewise unclear if  
71 and when specific members of the tick microbiota can interfere with *Borrelia* colonization of the  
72 tick, or if *Borrelia* impacts the tick microbiota in ways that might affect the dynamics of other  
73 tick-borne diseases.

74 Here, we use a large-scale experiment with tick offspring derived from wild-collected  
75 gravid tick mothers to investigate reciprocal interactions between *Borrelia afzelii*, an endemic  
76 cause of Lyme disease in Europe [29], and the microbiome of *Ixodes ricinus*, its primary vector.  
77 We found that disrupting the microbiome of larval *I. ricinus* ticks by bleaching egg casings has  
78 profound yet transient effects on the tick microbiota, but no effect on subsequent colonization by  
79 *B. afzelii* when ticks feed on *B. afzelii*-infected hosts. In contrast, feeding on *B. afzelii*-infected  
80 mice has pervasive effects on the composition and diversity of the tick microbiome, which are  
81 largely independent of prior microbiome disruption. This suggests that *B. afzelii* infection  
82 dynamics within rodent hosts have strong potential to sculpt the tick microbiota, with unclear  
83 consequences for the transmission of other tick-borne pathogens. Negative interactions between  
84 *B. afzelii* and other members of the tick microbiome might provide insights into the biological  
85 control of tick-borne diseases.

86

## 87 **Methods**

88 ***Borrelia*, ticks, and mice:** We used *Borrelia afzelii* isolate NE4049, which was obtained  
89 from an *I. ricinus* nymph at a field site near Neuchâtel, Switzerland. This strain has multi-locus

90 sequence type ST679, *ospC* major group allele A10, and strain ID number 1887 in the *Borrelia*  
91 MLST database. We used isolate NE4049 because we have previously shown that it is highly  
92 infectious for both mice and ticks [30-32]. Pathogen-free, female *Mus musculus* BALB/c ByJ  
93 mice were used as the vertebrate reservoir host. To infect mice via tick bite, we used *Ixodes*  
94 *ricinus* nymphs infected with isolate NE4049 that had been generated in a previous study [30]  
95 and that came from our laboratory colony of *Borrelia*-free *I. ricinus* ticks. For these *I. ricinus*  
96 nymphs, the percentage of nymphs infected with *B. afzelii* ranged between 80.0% and 100.0%.  
97 Uninfected control nymphs were obtained from our laboratory colony of *Borrelia*-free *I. ricinus*  
98 ticks.

99       **Experiment:** The experimental design of the study is shown in **Figure 1**. Engorged adult  
100 female *I. ricinus* ticks were collected from wild roe deer captured in the Sylve d'Argenson forest  
101 near Chizé, France. The female ticks were allowed to lay their eggs in the laboratory. Four weeks  
102 after deposition, each of the 10 clutches of eggs was split into two batches. One batch was rinsed  
103 with 10% bleach while the other batch was rinsed with water (**Figure 1**). The rinsed eggs were  
104 allowed to hatch into larvae under non-sterile conditions. To test whether the bleach treatment  
105 had reduced the microbiota in the larval ticks, a group of ~400 larvae was frozen for each of the  
106 20 batches at six weeks after hatching.

107       The remaining larvae for each of the 20 batches were split into two groups of ~100  
108 larvae. For each of the 20 batches of eggs (10 tick families x 2 egg washing treatments), one  
109 group of larvae was fed on an uninfected control mouse (n = 20 control mice) whereas the other  
110 group of larvae was fed on a *B. afzelii*-infected mouse (n = 20 infected mice; **Figure 1**). These  
111 mice had been infected with *B. afzelii* (or not) via nymphal tick bite (see below for details). The  
112 resultant engorged larvae were placed in individual Eppendorf tubes and allowed to moult into

113 nymphs. Four weeks after the larva-to-nymph moult, 10 nymphs were randomly selected from  
114 each mouse and were frozen at  $-80^{\circ}\text{C}$  (**Figure 1**). In summary, we froze 400 nymphs (10  
115 families\*2 egg washing treatments\* 2 mice infection statuses\*10 nymphs/mouse).

116 **Experimental infection of mice:** For the main experiment, 40 BALB/c mice were  
117 randomly assigned to either the control group or the infection group. Each mouse in the control  
118 group (n = 20) was infested with 5 uninfected *I. ricinus* nymphs, whereas each mouse in the  
119 infected group (n = 20) was infested with 5 *B. afzelii*-infected *I. ricinus* nymphs. Each of the 40  
120 mice had been infested with 5 nymphs, so that each mouse had similar immune experience with  
121 ticks. Five weeks after the nymphal challenge, an ear tissue biopsy and a blood sample were  
122 taken from each of the 40 mice. The ear tissue biopsy was tested for the presence of *B. afzelii*  
123 infection using qPCR. The blood sample was tested for *Borrelia*-specific antibodies using a  
124 commercial Lyme disease ELISA. These tests confirmed that the 20 mice in the infected group  
125 were infected with *B. afzelii*, whereas the 20 mice in the control group were uninfected. These 40  
126 mice were used to feed the larval ticks (see above and in **Figure 1**).

127 **Molecular methods for larval ticks:** The 20 groups of larval ticks that had been frozen  
128 were split into two sub-groups with ~200 larval ticks per sub-group. Half of these sub-groups  
129 were washed with ethanol prior to DNA extraction and the other sub-groups were not washed.  
130 DNA extraction of the 40 sub-groups of larval ticks was done using a QIAGEN kit following the  
131 manufacturer's instructions. The DNA of each sub-group was eluted into 100  $\mu\text{l}$  of distilled  
132 water. The DNA concentration was measured for each of the 40 sub-groups using a Nanodrop.  
133 For qPCR, the DNA concentration of each sub-group was adjusted to 5  $\text{ng}/\mu\text{l}$ . Two qPCR assays  
134 were performed independently for each DNA extraction: tick *calreticulin* and bacterial *16S*  
135 *rRNA*. Each qPCR assay contained 3  $\mu\text{l}$  of template for a total of 15  $\text{ng}$  of DNA.

136           **Molecular methods for nymphal ticks:** For each mouse, the 10 nymphs were split into  
137 two groups of 5 nymphs. Ticks in one group were washed with ethanol prior to DNA extraction  
138 and ticks in the other group were not washed. DNA extraction of whole ticks was done using a  
139 QIAGEN kit following the manufacturer's instructions. The DNA of each tick was eluted into 65  
140  $\mu$ l of distilled water. The DNA concentration was measured for each of the 400 nymphs using a  
141 Nanodrop. For qPCR, the DNA concentration of each tick was adjusted to 5 ng/ $\mu$ l. Three qPCR  
142 assays were performed independently for each DNA extraction: tick *calreticulin*, bacterial *16S*  
143 *rRNA*, and *Borrelia flagellin* (see electronic supplementary material (ESM) for details). Each  
144 qPCR assay contained 3  $\mu$ l of template for a total of 15 ng of DNA.

145           **Illumina Library Preparation and Sequencing of the *16S rRNA* gene:** Of the 400  
146 nymphs for which we had quantified bacterial load using the *16S rRNA* gene qPCR assay,  
147 Illumina sequencing was performed for 360 nymphs. Sample preparation consisted of two PCR  
148 reactions. In the first reaction we amplified a 464 bp fragment of the V3-V4 region of the *16s*  
149 *rRNA* gene using primers Bakt\_341F (5'CCTACGGGNGGCWGCAG-3') and Bakt\_805R  
150 (5'GACTACNVGGGTATCTAATCC-3') [33], designed with Illumina adapters. Reactions were  
151 performed in a final volume of 50  $\mu$ l using 2.5 U of HotStar HiFidelity DNA polymerase  
152 (Qiagen,Germany), 2.5  $\mu$ l of 10  $\mu$ M primers, 10  $\mu$ l of 15  $\mu$ M dNTP mix, with a thermal cycle  
153 with a denaturation step of 95°C for 5 min, 45 cycles of 94°C for 15 sec, 51°C for 45 seconds,  
154 and 72°C for 45 seconds, with a final elongation step at 72°C for 7 minutes. Amplicons were  
155 purified with the Wizard SV Gel and PCR Clean-Up system (Promega Switzerland).

156           The second PCR incorporated the sample barcodes. Reactions were performed in a final  
157 volume of 25  $\mu$ l using 1.25 U of HotStar HiFidelity DNA polymerase, 1  $\mu$ l of 10  $\mu$ M primers, 5  
158  $\mu$ l of 15  $\mu$ M dNTP mix. The thermocycler had a denaturation step of 95°C for 5 min, 12 cycles

159 of 95°C for 30 sec, 55°C for 30 seconds, and 72°C for 30 seconds, with a final elongation step of  
160 72°C for 5 minutes, and amplicons purified as above. The 360 purified amplicons were pooled in  
161 equimolar concentration using a Qubit 2.0 fluorometer (Invitrogen) and sequenced by  
162 Microsynth (Balgach, Switzerland) using an Illumina MiSeq v2 with 250 bp paired end output,  
163 followed by adaptor and quality trimming.

164

## 165 **Statistical Methods**

166 **Analysis of the bacterial load in the larvae:** For each sub-group of larval ticks, we  
167 divided the *16S rRNA* gene copy number by the *calreticulin* gene copy number. These *16S rRNA*  
168 to *calreticulin* ratios were log<sub>10</sub>-transformed to improve the normality of the data. The log<sub>10</sub>-  
169 transformed *16S rRNA* to *calreticulin* ratios were analyzed using linear mixed effects models  
170 (LMMs). Fixed factors included egg washing treatment (2 levels: water and bleach), larval tick  
171 washing treatment (2 levels: none and ethanol), and their interactions. Random factors included  
172 tick family. We used R/Bioconductor (v 3.4.2. or above) for analyses, including the *lme4*,  
173 *complexHeatmap*, *vegan*, and *phyloseq* packages [34-37].

174 **Data selection of the nymphs:** Of the 370 DNA extractions, 14 were not included in the  
175 analysis because their DNA concentrations were too low. After adjustment of the DNA  
176 concentration, the remaining 356 DNA extractions had a DNA concentration that ranged  
177 between 3.33 and 5.00 ng/μl so that the 3 μl of DNA template contained between 10.0 and 15.0  
178 ng of DNA.

179 **Analysis of the bacterial load in the nymphs:** For each tick, we divided the *16S rRNA*  
180 gene copy number by the *calreticulin* gene copy number. These ratios were log<sub>10</sub>-transformed to  
181 normalize the data. The log<sub>10</sub>-transformed *16S rRNA* to *calreticulin* ratios were analysed using



182 LMMs. Fixed factors included egg washing treatment (2 levels: water and bleach), *B. afzelii*  
183 infection status of the mouse (2 levels: uninfected control, infected), nymphal tick washing  
184 treatment (2 levels: none and ethanol), and their interactions. Random factors included tick  
185 family and mouse identity nested inside tick family.

186 **Analysis of the *B. afzelii* infection prevalence in the nymphs:** These analyses were  
187 restricted to the subset of nymphs that had fed as larvae on the *B. afzelii*-infected mice. We used  
188 a proportion test to determine whether the microbiome reduction of the egg washing treatment  
189 influenced the susceptibility of the nymphs to acquire *B. afzelii* infection during the larval blood  
190 meal. The nymphal infection status (0 = uninfected, 1 = infected) was also analysed using  
191 generalized linear mixed effects models (GLMMs) with binomial errors. Fixed factors included  
192 egg washing treatment, nymphal tick washing treatment, and their interaction. Random factors  
193 included tick family and mouse identity nested inside tick family.

194 **Analysis of the *B. afzelii* spirochete load in the nymphs:** This analysis was restricted to  
195 the subset of nymphs that were infected with *B. afzelii*. For each tick, we divided the *B. afzelii*  
196 *flagellin* gene copy number by the tick *calreticulin* gene copy number. These ratios were log<sub>10</sub>-  
197 transformed to normalize the data. The log<sub>10</sub>-transformed *flagellin* to *calreticulin* ratios were  
198 analysed using LMMs. Fixed factors included egg washing treatment, nymphal tick washing  
199 treatment, and their interaction. Random factors included tick family and mouse identity nested  
200 inside tick family.

201 **Analysis of 16S rRNA amplicons:** Because of limited overlap between the 250 bp read  
202 ends, we elected to use an OTU picking strategy that did not require first assembling paired end  
203 reads into contigs. We generated OTU tables using the CD-HIT-OTU-Miseq workflow [38]  
204 packaged with CD-HIT v 4.6.8. Forward and reverse read lengths were specified at 200 and 150

205 bp and clustered against the SILVA 132 99% OTU release [39], otherwise using default  
206 parameters that included using Trimmomatic for read trimming [40]. This identified 10,454  
207 OTUs, although the vast majority of reads (93.6%) recruited to the 100 most abundant OTUs. It  
208 also assigned taxonomy to only 926 OTUs (< 10%): for more robust taxonomic assignments, we  
209 applied Metaxa2 v2.2 [41] to the representative sequences for each OTU identified by CD-HIT  
210 using default parameters and the included reference database in Metaxa2. This identified 7,550  
211 OTUs as bacterial and provided taxonomies that were largely congruent with CD-HIT  
212 assignments, where evaluable; subsequent analyses were restricted to this bacterial OTU set.

213         The OTU table and taxonomy were imported to R (>v. 3.4.2), and analyzed using the  
214 *phyloseq*, *vegan*, and *DeSeq2* packages (as detailed in Results). Linear mixed models for  
215 univariable outcomes were implemented using the *lme4* package with a family as a random  
216 effect, or nesting mouse host within tick family. In analyses using *DeSeq2* and *db-RDA*, family  
217 was included as a fixed factor (*DeSeq2*) or a conditioning variable (*db-RDA*). We evaluated the  
218 reliability of our replicated sequencing/analysis approach on the same nymphal samples via the  
219 variance explained by sample in *db-RDA*, and the intraclass correlation coefficient for Shannon  
220 diversity. For statistical analyses requiring tick infection status, we imputed missing infection  
221 status for one *Borrelia*-exposed nymph as infected, as that was the most common state of  
222 exposed nymphs.

223

## 224 **Results**

### 225 *Egg bleaching profoundly disrupts the microbiome of tick larvae*

226         Egg bleaching had strong effects on the abundance of bacteria associated with tick larvae,  
227 as shown by a 27.5-fold reduction in the relative *16S rRNA* gene (hereafter *16S*) copy number

228 (scored via qPCR) in larvae hatching from bleached versus unbleached eggs (N = 29 evaluable  
229 samples; linear mixed model (LMM) controlling for tick family;  $P < 10^{-6}$ ;  $\log_{10}$  ratio of  
230 *16S/calreticulin* 0.24 versus 6.61, respectively; **Figure 2A**). This reduction was evident six  
231 weeks after treatment, demonstrating a profound effect of bleaching on the larval tick  
232 microbiome. In contrast, washing larvae with ethanol prior to DNA extraction, which is expected  
233 to reduce the external microbiota [but see 42], did not have a significant effect on the *16S* copy  
234 number (LMM;  $P = 0.12$ ; **Figure 2A**). Taken together, these observations suggest that the egg  
235 bleaching-induced reduction of *16S* copy number was driven by an increase in the relative  
236 abundance of the internal microbiota of the larval ticks at the expense of the external microbiota.

237       Multivariate analysis of the larval tick microbiome using db-RDA revealed that egg  
238 bleaching led to a clear shift in the *16S* community, whereas there was no discernible effect of  
239 washing the larvae prior to DNA extraction (db-RDA; based on Bray-Curtis dissimilarities of  
240  $\log_{10}$  OTU abundances, stratified by tick family. Permutation tests;  $P < 0.001$  and 0.727,  
241 respectively; **Figure 2B**). Consistent with our expectations, the most significantly  
242 (proportionally) enriched taxon due to bleaching was in the order Rickettsiales, which we further  
243 manually annotated to *Candidatus* Midichloria mitochondrii, an endosymbiont of *I. ricinus* that  
244 we expect would be unaffected by external bleaching (**Figure 2C**;  $P_{\text{adj}} < 10^{-6}$ ; shown are the  $\log_{10}$   
245 read counts per thousand mapped reads). In contrast, egg bleaching significantly reduced the  
246 relative abundance of *Pseudomonas* OTU 23 in the resultant larvae, which suggests that this  
247 bacterium is found on the surface of the eggshell (**Figure 2C**;  $P_{\text{adj}} < 10^{-3}$ ). Other significant  
248 effects associated with bleaching included an increase in *Methylobacterium*, a taxon that has  
249 been implicated as a potential contaminant of laboratory reagents [43]; these are consistent with  
250 the strong reduction in *16S* abundance we observed via qPCR. No OTUs changed significantly

251 from washing (all  $P_{\text{adj}} > 0.05$ ). In sum, egg bleaching dramatically decreased *I6S* copy number  
252 and shifted the microbial community composition in larvae measured at 6 weeks after treatment.  
253 Egg bleaching probably reduced the relative abundance of bacteria associated with the egg  
254 surface and thereby increased the relative abundance of endosymbiont bacteria. The lack of an  
255 observed effect of washing the larvae—on both microbial abundance and microbial diversity—  
256 suggests that external microbiota are a minor component of the *I6S* diversity in the lab-hatched  
257 tick larvae.

258

259 *Manipulation of the larval microbiome has no effect on the acquisition of B. afzelii, and the*  
260 *microbiome largely recovers in the unfed nymphs*

261 We screened nymphs for *B. afzelii* infection via qPCR and found no evidence that  
262 disruption of the larval microbiome affected either the percentage of ticks that acquired the  
263 infection while feeding (with infection prevalences of 68.2% and 73.5% in unbleached and  
264 bleached groups respectively; binomial GLMM;  $P = 0.44$ ,  $N = 183$ , **Figure 3A**) or *B. afzelii* copy  
265 number in the nymphs that became infected (LMM;  $P = 0.958$ ,  $N = 130$ ; **Figure 3B**). Thus,  
266 although the egg bleaching treatment was highly effective at reducing the microbiome in larvae,  
267 it did not affect the ability of *B. afzelii* to colonize ticks during or following the larval blood  
268 meal.

269 Although the egg bleaching treatment strongly reduced the *I6S* copy number in the  
270 larvae, the bacterial community largely recovered after these larvae had taken a blood meal and  
271 molted into nymphs, as there was no effect of the egg bleaching on *I6S* copy number in nymphs  
272 (LMM;  $P = 0.272$ ,  $N = 356$ , **Figure 3C**). Intriguingly, in contrast to the non-significant effect of  
273 ethanol washing on *I6S* copy number that we observed in larvae, there was a clear reduction

274 with both washing and *B. afzelii* exposure. The *I6S* copy number was lowest in ticks that were  
275 both washed and *B. afzelii*-exposed (LRT for interaction;  $P < 10^{-5}$ ), indicating that feeding on *B.*  
276 *afzelii*-infected mice reduced the internal bacterial load in nymphs; we investigate this hypothesis  
277 in more detail below.

278

279 *Host infection with B. afzelii has pervasive effects on the microbiome of I. ricinus nymphs*

280 To extend our analysis of larval ticks to the nymphal stage, we used *I6S* amplicon  
281 sequencing to profile replicate nymphs from each treatment alongside the larval samples (above).  
282 We again restricted these analyses to the 40 most abundant OTUs. As expected from prior  
283 reports [44, 45], there was a clear shift in the tick-associated bacterial community from larval to  
284 nymphal ticks (**Figure 4A**). There was, further, a striking effect of *B. afzelii* infection in the  
285 mouse on the tick microbiota as quantified in the nymphal stage, with pronounced differences  
286 between ticks fed on *B. afzelii*-infected versus control mice (db-RDA;  $P < 0.001$ ; **Figure 4B**  
287 shows unsupervised principal coordinates analysis (PCoA)). We also found that egg bleaching  
288 and ethanol washing prior to DNA extraction had modest but significant effects on microbiome  
289 composition in nymphs ( $P < 0.001$  and  $P = 0.014$ , respectively; **Figure 4B**), consistent with our  
290 finding that washing the nymphs decreased *I6S* copy number. While sequencing recovered  
291 OTUs annotated as *Borrelia*, the most abundant *Borrelia*-annotated OTU was ranked 81<sup>st</sup> in  
292 overall abundance and accounted for  $<0.05\%$  of total sequence reads. Thus, a direct contribution  
293 of sequenced *Borrelia I6S* amplicons in infected ticks does not explain these strong patterns.

294 Microbiome  $\alpha$ -diversity (measured as Shannon entropy) in nymphs modestly increased as  
295 a result of both microbiome disruption via egg bleaching (LMM;  $P = 0.035$ ;  $N = 305$ . **Figure**  
296 **5A**) and from *B. afzelii* infection ( $P = 0.0025$ ; **Figure 5B**) or exposure ( $P = 0.0007$ ; competing

297 multivariable model; **Figure 5B**). Coupled with the decrease in *I6S* copy number observed when  
298 feeding on *B. afzelii*-infected mice, these diversity effects appeared to be mediated through  
299 disproportionately negative impacts on abundant OTUs (e.g., *Stenotrophomonas*) leading to  
300 increased community evenness. As mentioned, these trends were evident when considering the  
301 infection status of the tick itself, or that of the mouse on which they were fed (**Figure 5C**).  
302 Comparison between control nymphs, uninfected nymphs, and infected nymphs demonstrated  
303 that it was feeding on an infected mouse rather than acquiring *B. afzelii* infection that was most  
304 important for determining the nymphal microbiome (**Figure 5C**). This was supported by  
305 comparing competing models with Akaike's Information Criterion (AIC), which found that  
306 feeding on an infected mouse was a much stronger predictor of both  $\alpha$ -diversity ( $\Delta\text{AIC} \sim 6$ ) and  
307 the multivariate bacterial community (**Figure 5A**;  $\Delta\text{AIC} \sim 14$  in models using first PCoA axis as  
308 response variable) than acquisition of *B. afzelii* by the tick (**Figure 5**), suggesting that the effects  
309 we observe are more likely to be caused by physiological or immunological characteristics of  
310 infected mice rather than the direct effects of *B. afzelii* infection in the ticks. Similarly,  
311 examining the OTU frequencies in bleached and *B. afzelii*-exposed ticks showed that these net  
312 effects were driven by proportional reductions in the dominant OTUs, with concomitant  
313 increases in less frequent OTUs (e.g. **Figure 4**). Collectively, these results are consistent with the  
314 strong effects of mouse *B. afzelii* infection status we observe on *I6S* copy number and suggest  
315 that these are specifically mediated by disproportionate negative effects on abundant bacterial  
316 OTUs.

317

318 *Microbial correlates of Borrelia exposure*

319 To characterize the recurrent shifts in the tick microbiome associated with *B. afzelii*  
320 exposure, we used negative binomial models implemented in *phyloseq/DESeq2*. In line with the  
321 global diversity shifts we observed, feeding on *B. afzelii*-infected mice led to significant changes  
322 in the relative frequencies of many OTUs (with 19/40 significant at  $P_{\text{adj}} < 0.05$ ; Figure 5). This  
323 was most evident in large decreases in the frequency of multiple *Stenotrophomonas* OTUs and  
324 other Gammaproteobacteria (**Figure 6**). As a result, there appeared to be a degree of taxonomic  
325 dependence in microbial responses to *B. afzelii* exposure, with Betaproteobacteria generally  
326 significantly increasing in frequency and Gammaproteobacteria decreasing (Fisher's exact test,  $P$   
327 = 0.004; **Figure 6**). Our analysis also revealed that several nymph OTUs that increased in  
328 frequency in response to tick bleaching, including two *Burkholderia* OTUs (Betaproteobacteria;  
329  $P_{\text{adj}} < 0.01$ ; **Figure 6**) and a *Bradyrhizobium* OTU (Alphaproteobacteria;  $P_{\text{adj}} < 0.01$ ; **Figure 6**),  
330 whereas no OTUs significantly (proportionally) decreased. Consistent with our expectations,  
331 ethanol washing prior to DNA extraction increased the relative abundance of the endosymbiotic  
332 *Candidatus* Midichloria mitochondrii (annotated as order *Rickettsiales*, Alphaproteobacteria) as  
333 well as *Spiroplasma* (Mollicutes) by 2.5 and 1.7-fold respectively ( $P_{\text{adj}} < 0.01$ ), corroborating an  
334 enriching effect of washing on the internal tick microbiota.

335

## 336 **Discussion**

337 Here, we used a highly replicated experiment on wild-collected tick families to examine  
338 the reciprocal interactions between the endogenous tick microbiota and *B.afzelii*. We used egg  
339 bleaching to radically disrupt the microbiome in larval ticks but found no evidence that this  
340 affected the subsequent susceptibility of ticks to infection with *B. afzelii*. Rather, this work  
341 revealed striking effects of feeding on *B. afzelii*-infected mice on the tick microbiome; these

342 effects superseded those of actually acquiring an infection, as judged by comparing competing  
343 statistical models, and the resultant partitioning of samples in microbial community space (e.g.,  
344 **Figure 4A, 5C**).

345 A growing number of studies have investigated whether dysbiosing ticks influences their  
346 susceptibility to acquiring tick-borne pathogens [8, 11-13]. In some systems, microbiome  
347 disruption makes tick species more susceptible to infection with tick-borne pathogens [8, 13],  
348 whereas other systems found the opposite effect [11, 12]. In the present study, we found no  
349 evidence that microbiome disruption influenced *B. afzelii* infection rates or the *B. afzelii*  
350 spirochete load in infected ticks. In contrast, a previous study found that dysbiosed *I. scapularis*  
351 larvae were less likely to acquire *B. burgdorferi* ss and contained lower bacterial loads compared  
352 to control larvae [12]. These two studies differed in a number of factors including the *Borrelia*  
353 species, the *Ixodes* tick species, and the method of dysbiosis. An important aspect of the present  
354 study is that we investigated whether dysbiosis of the eggs influenced the infection status of the  
355 nymphs, which is the stage that is actually critical for the transmission of Lyme disease in nature  
356 [46].

357 Despite the fact that bleaching the eggs was highly effective at reducing the bacterial  
358 microbiome in the resultant larvae, this method of ‘dysbiosis’ did not have a meaningful impact  
359 on *B. afzelii* transmission. While the presence of additional bacteria to those uncovered here  
360 could influence these patterns, we found little influence of tick family on the recovered bacterial  
361 communities, outside of potentially vertically transmitted bacteria such as *Spiroplasma*,  
362 suggesting the microbial community of *I. ricinus* is largely homogenous at the scale studied here.  
363 Our method of dysbiosis further highlights the neglected importance of maternal transmission of  
364 gut symbionts in ticks. In arthropods, gut symbionts are typically vertically transmitted by



365 superficial bacterial contamination of eggs (egg smearing) [47]. Our egg washing with bleach  
366 has removed such maternally inherited gut symbionts and this impacted the microbial  
367 communities hosted by larvae. Our study shows that egg smearing is a key mechanism for  
368 colonization of ticks by their associated microbes.

369 *B. afzelii* infection reduced the microbial abundance (in the ethanol-washed nymphs) and  
370 changed the microbial community in the unfed nymphs. Notably, we observed changes in OTU  
371 relative abundance to be, at least in part, taxon-specific with decreases in Gammaproteobacteria  
372 and increases in Betaproteobacteria (**Figure 6**). The observation that mouse infection status was  
373 more important than tick infection status suggests that the blood physiology at the time of the  
374 larval blood meal was critical for structuring the subsequent nymph microbiome. Metabolomic  
375 studies of mouse serum samples have shown that *B. burgdorferi* ss infection changes the blood  
376 concentration of amino acids, energy metabolites, and aromatic compounds [48], which could  
377 influence the development of the tick microbiome. Infection with *B. burgdorferi* sl stimulates the  
378 host immune system, which could also exert collateral damage on the tick microbiome [49-52].  
379 For example, elevated levels of complement, cytokines, leukocytes, and reactive oxygen species  
380 in the blood [52-55] may interact inside the tick to have negative effects on the midgut  
381 microbiome. In summary, our study suggests that the physiological and immunological changes  
382 associated with infection in the vertebrate host have important consequences for the microbiome  
383 of feeding ticks.

384

## 385 **Conclusions**

386 In summary, we found that egg bleaching resulted in a 30-fold reduction of the microbiome of  
387 larval ticks. This microbiome manipulation had no effect on the ability of larval ticks to acquire

388 *B. afzelii* after feeding on infected mice. Once the engorged larvae had moulted into unfed  
389 nymphs, the dramatic effect of the egg bleach treatment on the tick microbiome had mostly  
390 disappeared. The *B. afzelii* infection status of the mice that provided the larval blood meal had a  
391 dramatic effect on the microbiome of the resultant unfed nymphs. Our study suggests that  
392 infection in the vertebrate host influences the quality of the larval blood meal with long-term  
393 consequences for the tick microbiome that persist into the nymphal stage.

394

395

396 **Ethics approval and consent to participate:** The commission that is part of the “Service de la  
397 Consommation et des Affaires Vétérinaires (SCAV)” of Canton Vaud, Switzerland evaluated  
398 and approved the ethics of this study. The Veterinary Service of the Canton of Neuchâtel,  
399 Switzerland issued the animal experimentation permit used in this study (NE04/2014).

400

401 **Availability of data and materials:** Raw sequencing reads will be deposited at NCBI (accession  
402 pending). Supplementary data and scripts to reproduce the analysis will be made available at  
403 [github.com/onecarbon/tickdysbiosis](https://github.com/onecarbon/tickdysbiosis) (pending).

404

405 **Competing interests:** The authors declare that they have no competing interests.

406

407 **Funding:** This work was supported by the following grants awarded to Maarten J. Voordouw: a  
408 Swiss National Science Foundation grant (FN 31003A\_141153) and a Discovery Grant from the  
409 Natural Sciences and Engineering Research Council of Canada (RGPIN-2019-04483). PTH was  
410 supported by a Canadian Institutes for Health Research PDF.

411

412 **Authors' contributions:** EM, OD, OP and MJV conceived and designed the study. EM, AS, and  
413 AB conducted the experiment and performed the molecular work. PTH and MJV analysed the  
414 data and wrote the manuscript. GH created the figure of the experimental design. All authors  
415 read and approved the final version of the manuscript.

416

417 **Acknowledgments:** We thank Gilles Capron (Office National de la Chasse et de la Faune  
418 Sauvage) and the Office National des Forêts of the Réserve biologique domaniale intégrale de la  
419 Sylve d'Argenson for permission to collect ticks on roe deer captured in the Chizé forest  
420 (France).

421

422

423

424  
425  
426  
427  
428  
429  
430  
431  
432  
433  
434  
435  
436  
437  
438  
439  
440  
441  
442  
443  
444  
445  
446  
447  
448  
449  
450  
451  
452  
453  
454  
455  
456  
457  
458  
459  
460  
461  
462  
463  
464  
465  
466  
467  
468

## References

1. Jones KE, Patel NG, Levy MA, Storeygard A, Balk D, Gittleman JL, et al. Global trends in emerging infectious diseases. *Nature (Lond)*. 2008;451:990-4.
2. Kilpatrick AM, Randolph SE. Drivers, dynamics, and control of emerging vector-borne zoonotic diseases. *Lancet*. 2012;380(9857):1946-55; doi: 10.1016/s0140-6736(12)61151-9.
3. McGraw EA, O'Neill SL. Beyond insecticides: new thinking on an ancient problem. *Nat Rev Microbiol*. 2013;11(3):181-93; doi: 10.1038/nrmicro2968.
4. Bonnet SI, Binetruy F, Hernandez-Jarguin AM, Duron O. The tick microbiome: why non-pathogenic microorganisms matter in tick biology and pathogen transmission. *Front Cell Infect Microbiol*. 2017;7; doi: 10.3389/fcimb.2017.00236.
5. de la Fuente J, Antunes S, Bonnet S, Cabezas-Cruz A, Domingos AG, Estrada-Pena A, et al. Tick-pathogen interactions and vector competence: identification of molecular drivers for tick-borne diseases. *Front Cell Infect Microbiol*. 2017;7; doi: 10.3389/fcimb.2017.00114.
6. Narasimhan S, Fikrig E. Tick microbiome: the force within. *Trends Parasitol*. 2015;31(7):315-23; doi: 10.1016/j.pt.2015.03.010.
7. Weiss B, Aksoy S. Microbiome influences on insect host vector competence. *Trends Parasitol*. 2011;27(11):514-22; doi: 10.1016/j.pt.2011.05.001.
8. Abraham NM, Liu L, Jutras BL, Yadav AK, Narasimhan S, Gopalakrishnan V, et al. Pathogen-mediated manipulation of arthropod microbiota to promote infection. *Proc Natl Acad Sci U S A*. 2017;114(5):E781-E90; doi: 10.1073/pnas.1613422114.
9. Cirimotich CM, Dong Y, Clayton AM, Sandiford SL, Souza-Neto JA, Mulenga M, et al. Natural microbe-mediated refractoriness to *Plasmodium Infection* in *Anopheles gambiae*. *Science*. 2011;332(6031):855-8; doi: 10.1126/science.1201618.
10. Dong Y, Manfredini F, Dimopoulos G. Implication of the mosquito midgut microbiota in the defense against malaria parasites. *PLOS Pathog*. 2009;5(5); doi: 10.1371/journal.ppat.1000423.
11. Gall CA, Reif KE, Scoles GA, Mason KL, Mousel M, Noh SM, et al. The bacterial microbiome of *Dermacentor andersoni* ticks influences pathogen susceptibility. *ISME Journal*. 2016;10(8):1846-55; doi: 10.1038/ismej.2015.266.
12. Narasimhan S, Rajeevan N, Liu L, Zhao YO, Heisig J, Pan JY, et al. Gut microbiota of the tick vector *Ixodes scapularis* modulate colonization of the Lyme disease spirochete. *Cell Host & Microbe*. 2014;15(1):58-71; doi: 10.1016/j.chom.2013.12.001.
13. Li LH, Zhang Y, Zhu D, Zhou XN. Endosymbionts alter larva-to-nymph transstadial transmission of *Babesia microti* in *Rhipicephalus haemaphysaloides* ticks. *Frontiers in Microbiology*. 2018;9; doi: 10.3389/fmicb.2018.01415.
14. McMeniman CJ, Lane RV, Cass BN, Fong AWC, Sidhu M, Wang YF, et al. Stable introduction of a life-shortening *Wolbachia* infection into the mosquito *Aedes aegypti*. *Science*. 2009;323(5910):141-4; doi: 10.1126/science.1165326.
15. Bian GW, Xu Y, Lu P, Xie Y, Xi ZY. The endosymbiotic bacterium *Wolbachia* induces resistance to dengue virus in *Aedes aegypti*. *PLOS Pathog*. 2010;6(4); doi: 10.1371/journal.ppat.1000833.

- 469 16. Kambris Z, Cook PE, Phuc HK, Sinkins SP. Immune activation by life-shortening  
470 *Wolbachia* and reduced filarial competence in mosquitoes. *Science*. 2009;326(5949):134-  
471 6; doi: 10.1126/science.1177531.
- 472 17. Moreira LA, Iturbe-Ormaetxe I, Jeffery JA, Lu G, Pyke AT, Hedges LM, et al. A  
473 *Wolbachia* symbiont in *Aedes aegypti* limits infection with dengue, chikungunya, and  
474 *Plasmodium*. *Cell*. 2009;139(7):1268-78; doi: 10.1016/j.cell.2009.11.042.
- 475 18. Hoffmann AA, Montgomery BL, Popovici J, Iturbe-Ormaetxe I, Johnson PH, Muzzi F, et  
476 al. Successful establishment of *Wolbachia* in *Aedes* populations to suppress dengue  
477 transmission. *Nature*. 2011;476(7361):454-U107; doi: 10.1038/nature10356.
- 478 19. Walker T, Johnson PH, Moreira LA, Iturbe-Ormaetxe I, Frentiu FD, McMeniman CJ, et  
479 al. The wMel *Wolbachia* strain blocks dengue and invades caged *Aedes aegypti*  
480 populations. *Nature*. 2011;476(7361):450-U101; doi: 10.1038/nature10355.
- 481 20. Dantas-Torres F, Chomel BB, Otranto D. Ticks and tick-borne diseases: a One Health  
482 perspective. *Trends Parasitol*. 2012;28(10):437-46; doi: 10.1016/j.pt.2012.07.003.
- 483 21. Kurtenbach K, Hanincova K, Tsao JI, Margos G, Fish D, Ogden NH. Fundamental  
484 processes in the evolutionary ecology of Lyme borreliosis. *Nat Rev Microbiol*.  
485 2006;4:660-9.
- 486 22. Lindquist L, Vapalahti O. Tick-borne encephalitis. *Lancet*. 2008;371(9627):1861-71; doi:  
487 10.1016/s0140-6736(08)60800-4.
- 488 23. Stuenkel S, Granquist EG, Silaghi C. *Anaplasma phagocytophilum*-a widespread multi-host  
489 pathogen with highly adaptive strategies. *Front Cell Infect Microbiol*. 2013;3; doi:  
490 10.3389/fcimb.2013.00031.
- 491 24. Gasmi S, Ogden NH, Lindsay L, Burns S, Fleming S, Badcock J, et al. Surveillance for  
492 Lyme disease in Canada: 2009–2015. *Canada Communicable Disease Report*.  
493 2017;43(10):194-9.
- 494 25. Godfrey ER, Randolph SE. Economic downturn results in tick-borne disease upsurge.  
495 *Parasit Vectors*. 2011;4; doi: 10.1186/1756-3305-4-35.
- 496 26. Mysterud A, Easterday WR, Stigum VM, Aas AB, Meisingset EL, Viljugrein H.  
497 Contrasting emergence of Lyme disease across ecosystems. *Nature Communications*.  
498 2016;7; doi: 10.1038/ncomms11882.
- 499 27. Mysterud A, Jore S, Østerås O, Viljugrein H. Emergence of tick-borne diseases at  
500 northern latitudes in Europe: a comparative approach. *Scientific Reports*.  
501 2017;7(1):16316; doi: 10.1038/s41598-017-15742-6.
- 502 28. Ogden NH, Lindsay LR, Morshed M, Sockett PN, Artsob H. The emergence of Lyme  
503 disease in Canada. *Canadian Medical Association Journal*. 2009;180(12):1221-4; doi:  
504 10.1503/cmaj.080148.
- 505 29. van Duijvendijk G, Sprong H, Takken W. Multi-trophic interactions driving the  
506 transmission cycle of *Borrelia afzelii* between *Ixodes ricinus* and rodents: a review.  
507 *Parasit Vectors*. 2015;8:1-11; doi: 10.1186/s13071-015-1257-8.
- 508 30. Belli A, Sarr A, Rais O, Rego ROM, Voordouw MJ. Ticks infected via co-feeding  
509 transmission can transmit Lyme borreliosis to vertebrate hosts. *Scientific Reports*.  
510 2017;7(1):5006; doi: 10.1038/s41598-017-05231-1.
- 511 31. Jacquet M, Genné D, Belli A, Maluenda E, Sarr A, Voordouw MJ. The abundance of the  
512 Lyme disease pathogen *Borrelia afzelii* declines over time in the tick vector *Ixodes*  
513 *ricinus*. *Parasit Vectors*. 2017;10(1):257; doi: 10.1186/s13071-017-2187-4.

- 514 32. Jacquet M, Margos G, Fingerle V, Voordouw MJ. Comparison of the lifetime host-to-tick  
515 transmission between two strains of the Lyme disease pathogen *Borrelia afzelii*. Parasit  
516 Vectors. 2016;9; doi: 10.1186/s13071-016-1929-z.
- 517 33. Herlemann DPR, Labrenz M, Jurgens K, Bertilsson S, Waniek JJ, Andersson AF.  
518 Transitions in bacterial communities along the 2000 km salinity gradient of the Baltic  
519 Sea. Isme Journal. 2011;5(10):1571-9; doi: 10.1038/ismej.2011.41.
- 520 34. Oksanen J, Blanchet FG, Friendly M, Kindt R, Legendre P, McGlinn D, et al.: vegan:  
521 Community Ecology Package. R package version 2.5-6. [https://CRAN.R-](https://CRAN.R-project.org/package=vegan)  
522 [project.org/package=vegan](https://CRAN.R-project.org/package=vegan). In.; 2019.
- 523 35. Bates D, Machler M, Bolker BM, Walker SC. Fitting Linear Mixed-Effects Models  
524 Using lme4. Journal of Statistical Software. 2015;67(1):1-48; doi: 10.18637/jss.v067.i01.
- 525 36. Gu ZG, Eils R, Schlesner M. Complex heatmaps reveal patterns and correlations in  
526 multidimensional genomic data. Bioinformatics. 2016;32(18):2847-9; doi:  
527 10.1093/bioinformatics/btw313.
- 528 37. McMurdie PJ, Holmes S. phyloseq: An R Package for Reproducible Interactive Analysis  
529 and Graphics of Microbiome Census Data. PLOS ONE. 2013;8(4); doi:  
530 10.1371/journal.pone.0061217.
- 531 38. Li W, Chang Y. CD-HIT-OTU-MiSeq, an Improved Approach for Clustering and  
532 Analyzing Paired End MiSeq 16S rRNA Sequences. bioRxiv. 2017:153783; doi:  
533 10.1101/153783.
- 534 39. Quast C, Pruesse E, Yilmaz P, Gerken J, Schweer T, Yarza P, et al. The SILVA  
535 ribosomal RNA gene database project: improved data processing and web-based tools.  
536 Nucleic Acids Res. 2013;41(D1):D590-D6; doi: 10.1093/nar/gks1219.
- 537 40. Bolger AM, Lohse M, Usadel B. Trimmomatic: a flexible trimmer for Illumina sequence  
538 data. Bioinformatics. 2014;30(15):2114-20; doi: 10.1093/bioinformatics/btu170.
- 539 41. Bengtsson-Palme J, Hartmann M, Eriksson KM, Pal C, Thorell K, Larsson DGJ, et al.  
540 METAXA2: improved identification and taxonomic classification of small and large  
541 subunit rRNA in metagenomic data. Molecular Ecology Resources. 2015;15(6):1403-14;  
542 doi: 10.1111/1755-0998.12399.
- 543 42. Binetruy F, Dupraz M, Buysse M, Duron O. Surface sterilization methods impact  
544 measures of internal microbial diversity in ticks. Parasit Vectors. 2019;12:10; doi:  
545 10.1186/s13071-019-3517-5.
- 546 43. Salter SJ, Cox MJ, Turek EM, Calus ST, Cookson WO, Moffatt MF, et al. Reagent and  
547 laboratory contamination can critically impact sequence-based microbiome analyses.  
548 BMC Biology. 2014;12; doi: 10.1186/s12915-014-0087-z.
- 549 44. Heise SR, Elshahed MS, Little SE. Bacterial diversity in *Amblyomma americanum*  
550 (Acari: Ixodidae) with a focus on members of the genus *Rickettsia*. J Med Entomol.  
551 2010;47(2):258-68; doi: 10.1603/me09197.
- 552 45. Zolnik CP, Prill RJ, Falco RC, Daniels TJ, Kolokotronis S-O. Microbiome changes  
553 through ontogeny of a tick pathogen vector. Mol Ecol. 2016;25(19):4963-77; doi:  
554 10.1111/mec.13832.
- 555 46. Diuk-Wasser MA, Hoen AG, Cislo P, Brinkerhoff R, Hamer SA, Rowland M, et al.  
556 Human risk of infection with *Borrelia burgdorferi*, the Lyme disease agent, in Eastern  
557 United States. Am J Trop Med Hyg. 2012;86(2):320-7; doi: 10.4269/ajtmh.2012.11-  
558 0395.

- 559 47. Salem H, Florez L, Gerardo N, Kaltenpoth M. An out-of-body experience: the  
560 extracellular dimension for the transmission of mutualistic bacteria in insects. *P Roy Soc*  
561 *B-Biol Sci.* 2015;282(1804); doi: 10.1098/rspb.2014.2957.
- 562 48. Glader O, Puljula E, Jokioja J, Karonen M, Sinkkonen J, Hytonen J. NMR metabolome  
563 of *Borrelia burgdorferi* in vitro and in vivo in mice. *Scientific Reports.* 2019;9; doi:  
564 10.1038/s41598-019-44540-5.
- 565 49. LaRocca TJ, Benach JL. The important and diverse roles of antibodies in the host  
566 response to *Borrelia* infections. *Curr Top Microbiol Immunol.* 2008;319:63-103.
- 567 50. Tracy KE, Baumgarth N. *Borrelia burgdorferi* manipulates innate and adaptive immunity  
568 to establish persistence in rodent reservoir hosts. *Frontiers in Immunology.* 2017;8; doi:  
569 10.3389/fimmu.2017.00116.
- 570 51. Wooten RM, Weis JJ. Host-pathogen interactions promoting inflammatory Lyme  
571 arthritis: use of mouse models for dissection of disease processes. *Curr Opin Microbiol.*  
572 2001;4(3):274-9; doi: 10.1016/s1369-5274(00)00202-2.
- 573 52. Kraiczy P. Travelling between two worlds: complement as a gatekeeper for an expanded  
574 host range of Lyme disease spirochetes. *Veterinary Sciences.* 2016;3(2):12.
- 575 53. Kang IS, Barthold SW, Persing DH, Bockenstedt LK. T-helper-cell cytokines in the early  
576 evolution of murine Lyme arthritis. *Infect Immun.* 1997;65(8):3107-11.
- 577 54. Schwanz LE, Voordouw MJ, Brisson D, Ostfeld RS. *Borrelia burgdorferi* has minimal  
578 impact on the Lyme disease reservoir host *Peromyscus leucopus*. *Vector-Borne Zoonot.*  
579 2011;11(2):117-24; doi: 10.1089/vbz.2009.0215.
- 580 55. Seller KP, Vavrin Z, Eichwald E, Hibbs JB, Weis JJ. Nitric oxide production during  
581 murine Lyme disease - lack of involvement in host-resistance or pathology. *Infect*  
582 *Immun.* 1995;63(10):3886-95.

583  
584  
585

586  
587  
588  
589

## Figure Legends:

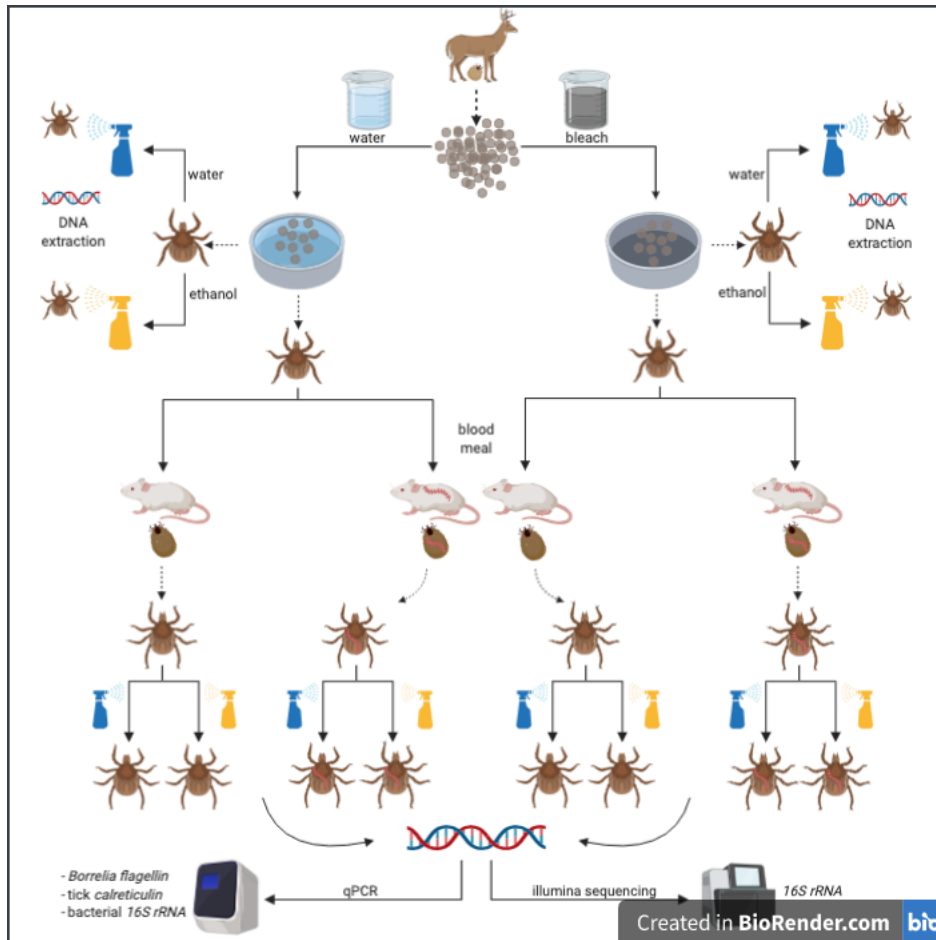

590

591

592 **Figure 1.** Experimental design. Engorged female *I. ricinus* ticks (n = 10) were collected from roe  
593 deer captured in the Chizé forest, France and laid their eggs in the laboratory. Each of the 10 egg  
594 batches was split into two batches and rinsed with either 10% bleach (n = 10 batches) or distilled  
595 water (n = 10 batches) and hatched into larvae. To determine whether the egg bleaching  
596 treatment reduced the microbiome, a subset of larvae was tested using qPCR and Illumina  
597 sequencing of the bacterial *16S rRNA* gene. Larvae for each of the 20 batches were split into two  
598 groups of ~100 larvae. For each of the 20 batches of eggs (10 tick families x 2 egg washing  
599 treatments), one group of larvae was fed on an uninfected control mouse (n = 20 control mice)  
600 whereas the other group of larvae was fed on a *B. afzelii*-infected mouse (n = 20 infected mice).  
601 Engorged larvae were placed in individual Eppendorf tubes to moult into nymphs. Four weeks  
602 after the moult, 10 nymphs were randomly selected from each of the 40 mice and frozen at –  
603 80°C (n = 400 nymphs). These nymphs were tested for *B. afzelii* infection using qPCR and for  
604 their bacterial load and microbiome using qPCR and Illumina sequencing of the bacterial *16S*  
605 *rRNA* gene.  
606



607

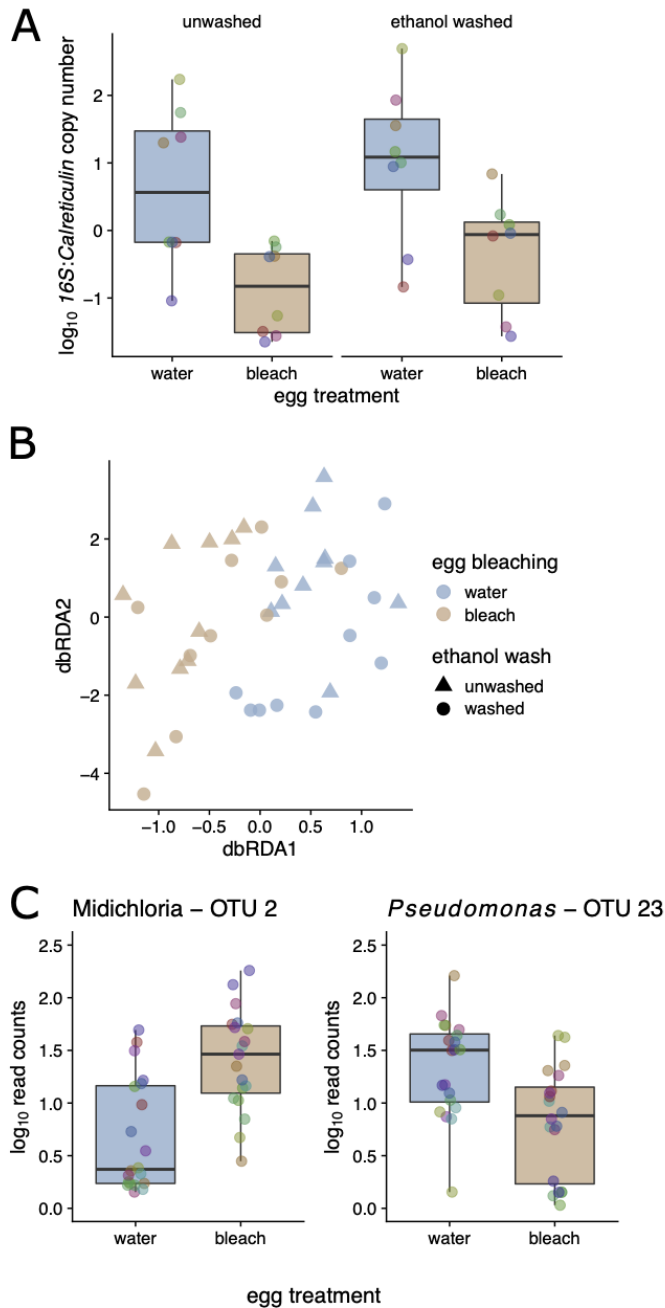

608

609 **Figure 2. Bleaching of egg casings profoundly decreases the abundance of microbiota in**  
610 **larval ticks.** Pooled *Ixodes scapularis* larvae were quantified six weeks after egg bleaching. **A.**  
611 Egg bleaching led to a ~27.5-fold reduction in the relative copy number of the 16S rRNA in  
612 larvae (vs tick *calreticulin*;  $P < 0.001$ ), irrespective of ethanol washing prior to DNA extraction  
613 ( $P > 0.05$ ). **B.** Egg bleaching, but not washing with ethanol prior to DNA extraction, led to  
614 significant shifts in the bacterial community, as measured by 16S amplicon sequencing and  
615 dbRDA ( $P < 0.001$  and  $P > 0.05$ , respectively). **C.** The most enriched taxon in response to egg  
616 bleaching was *Candidatus* *Midichloria mitochondrii* ( $P_{adj} < 0.001$ ); in contrast the most depleted  
617 was a *Pseudomonas* OUT (the Y-axis has units of number of read counts per thousand mapped

618 reads). Colored points in boxplots represent individual data points (pooled larval samples,  
619 colored by the tick mother; 'family'; N = 10).  
620  
621  
622

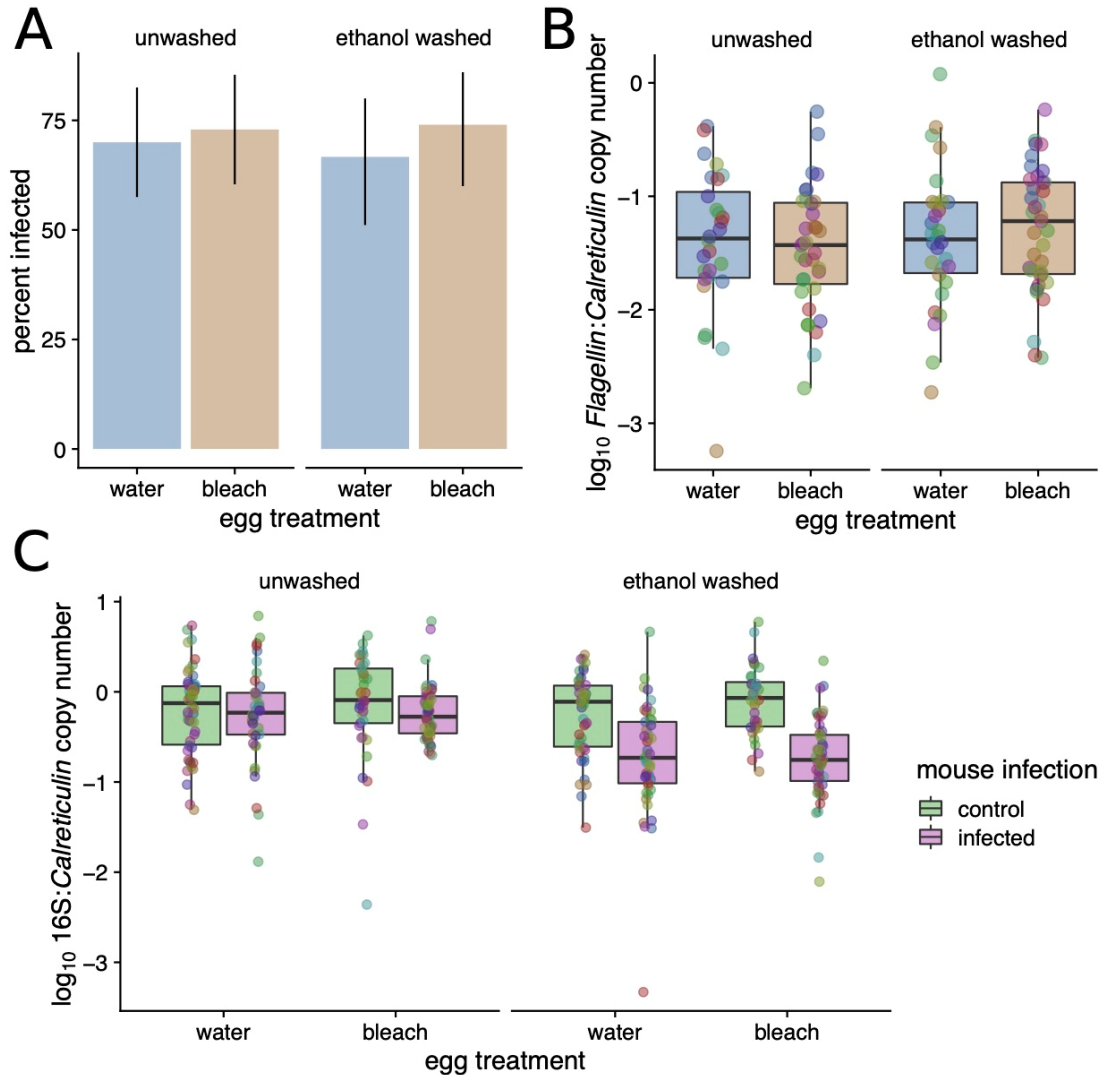

623

624 **Figure 3. 'Dysbiosing' larval ticks does not affect infection success by *B. afzelii*.** Neither **A.**  
625 the percentage of nymphs that acquired *B. afzelii* during their larval blood meal nor **B.** the  
626 inferred *B. afzelii* load in these nymphs were affected by prior microbiome disruption (all  $P \gg$   
627 0.05). **C.** Feeding on *B. afzelii*-infected mice decreased the bacterial load in *I. ricinus* nymphs;  
628 this effect was more visible in the nymphs that were washed prior to DNA extraction compared  
629 to the unwashed nymphs.

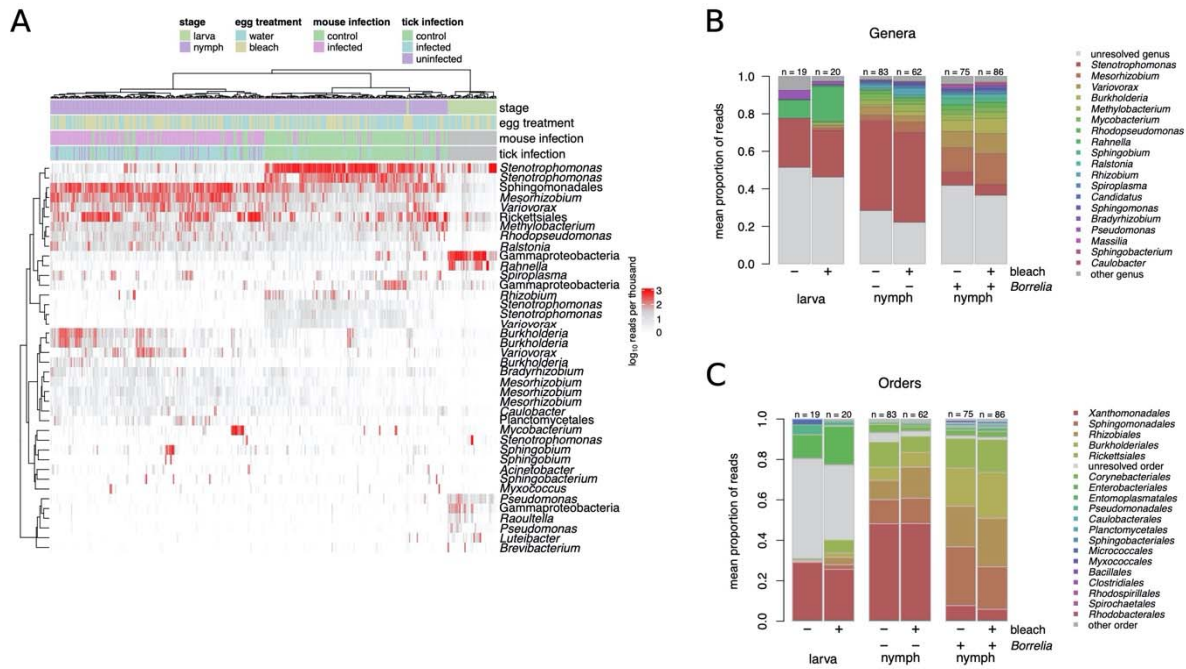

630

631 **Figure 4. Life history stage and *B. afzelii* exposure affect tick microbiome.** **A.** Heatmap of  
 632 number of reads assigned ( $\log_{10}(x+1)$  per thousand) for top 40 OTUs across all samples in the  
 633 experiment. Highest taxonomy reliably assigned by Metaxa2 is shown. Dendrograms are based  
 634 on hierarchical clustering of Bray-Curtis dissimilarities using Ward's method. **B.** Composition of  
 635 treatment groups and life histories, with top 40 OTUs aggregated (as mean of samples per group)  
 636 at the genus level. **C.** As above, at the order level.

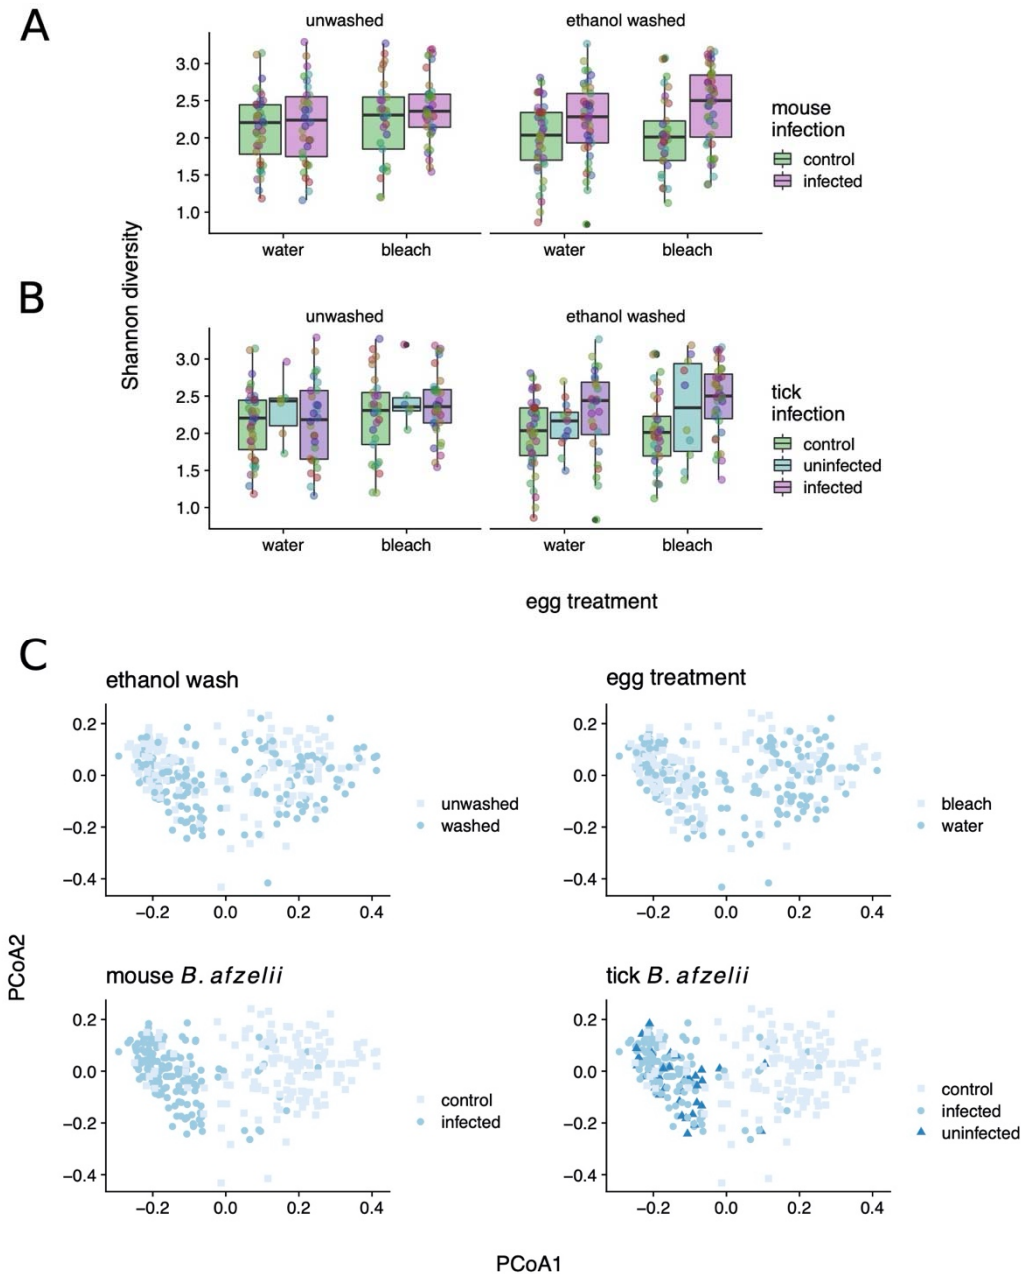

637

638 **Figure 5. Egg bleaching and rinsing and *B. afzelii* exposure increase the diversity of the 16S**  
639 **microbiome of *I ricinus* nymphs.** Shannon diversity increases in both **A.** *B. afzelii* exposed  
640 ticks and **B.** *B. afzellii* infected ticks ( $P < 0.01$ ). Akaike's Information Criterion (AIC) shows  
641 exposure to be a stronger predictor of Shannon diversity than infection ( $\Delta\text{AIC} \sim 6$ ) in linear  
642 mixed models. Points represent individual tick nymphs colored by family of origin. **C.** Principal  
643 Coordinates Analysis of nymphal 16S counts, colored by experimental factors; *B afzelii* exposure  
644 best stratifies groups on PCoA 1 ( $\Delta\text{AIC} \sim 11$  vs infection).  
645

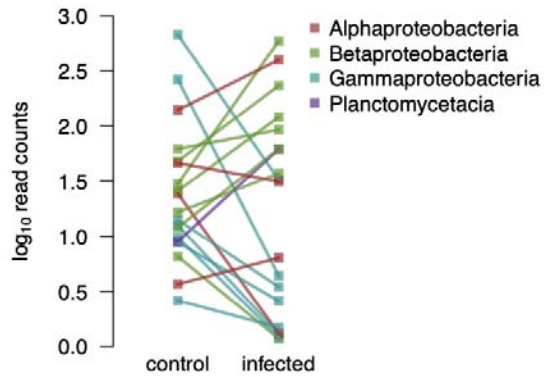

646  
647

648 **Figure 6.** Proportional abundance of taxa that changed significantly in *I. ricinus* nymphs (19/40  
649 at  $P_{adj} < 0.05$ ) in response to feeding on *B. afzelii* infected mice, shown at the level of class.

650 There is significant taxonomic dependence (Fisher's exact test  $P = 0.004$ ) of taxonomic response.

651  
652

653 **Supplemental Material:**

654

655 **Data S0:** Description of molecular methods

656

657 **Data S1:** Metadata

658

659 **Data S2:** Metadata

660

661 **Data S3:** OTU table produced by CD-HIT-OTU\_MiSEQ.

662

663 **Data S4:** OTU clusters produced by CD-HIT-OTU\_MiSEQ.

664

665 **Data S5:** OTI taxonomy assigned by Metaxa2.

666

667
